# Supplementary material for: Salmonella-liberated dietary L-arabinose promotes expansion in superspreaders
Source: PubMed Central journal article supplement (PMC10016319; doi:10.1016/j.chom.2023.01.017), 2023-03-08
Supplement: mmc1.pdf [file mmc1.pdf]

Cell Host & Microbe, Volume 31

**Supplemental information**

***Salmonella*-liberated dietary L-arabinose  
promotes expansion in superspreaders**

**Sarah J. Ruddle, Liliana M. Massis, Alyssa C. Cutter, and Denise M. Monack**

## Supplemental figure 1

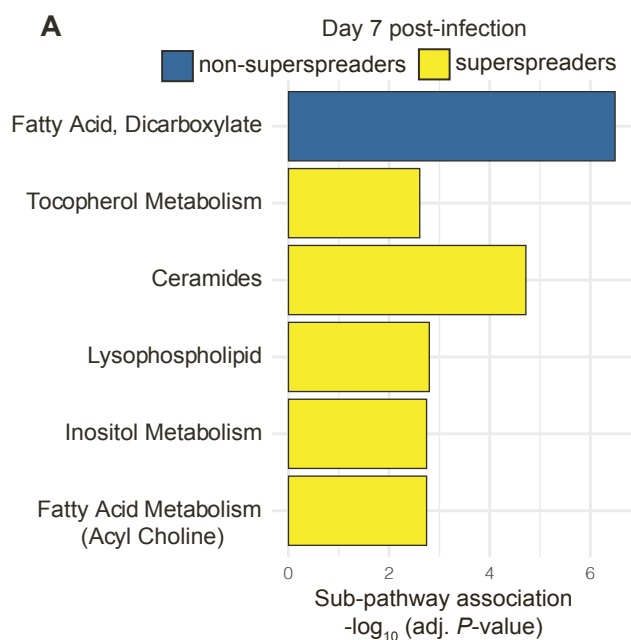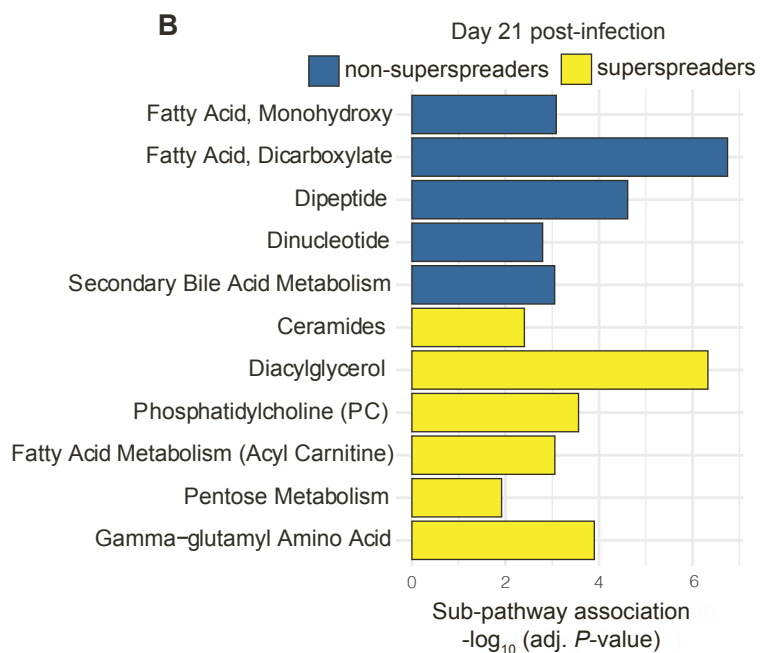

Supplemental figure 2

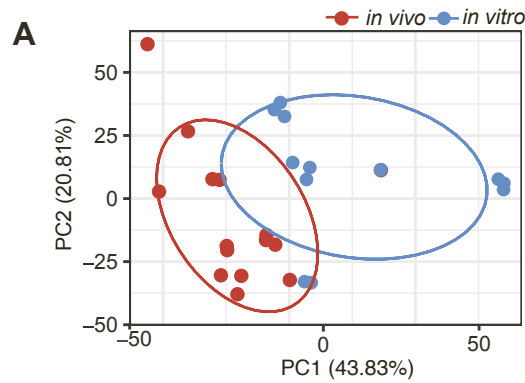

**B**

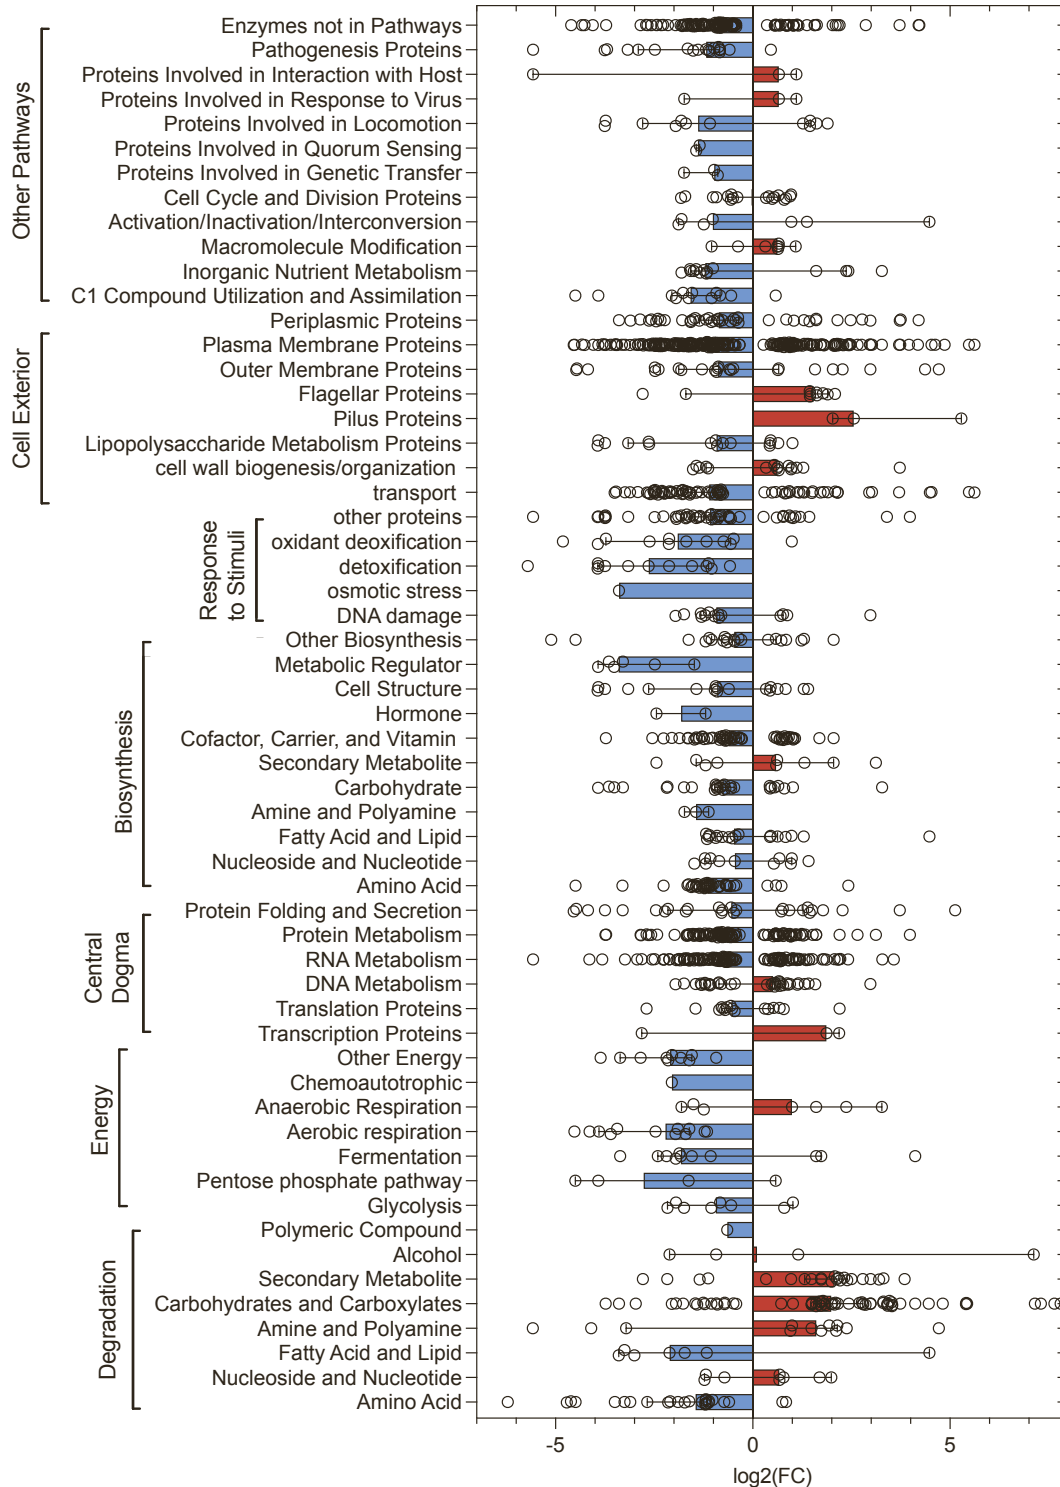

### Supplemental figure 3

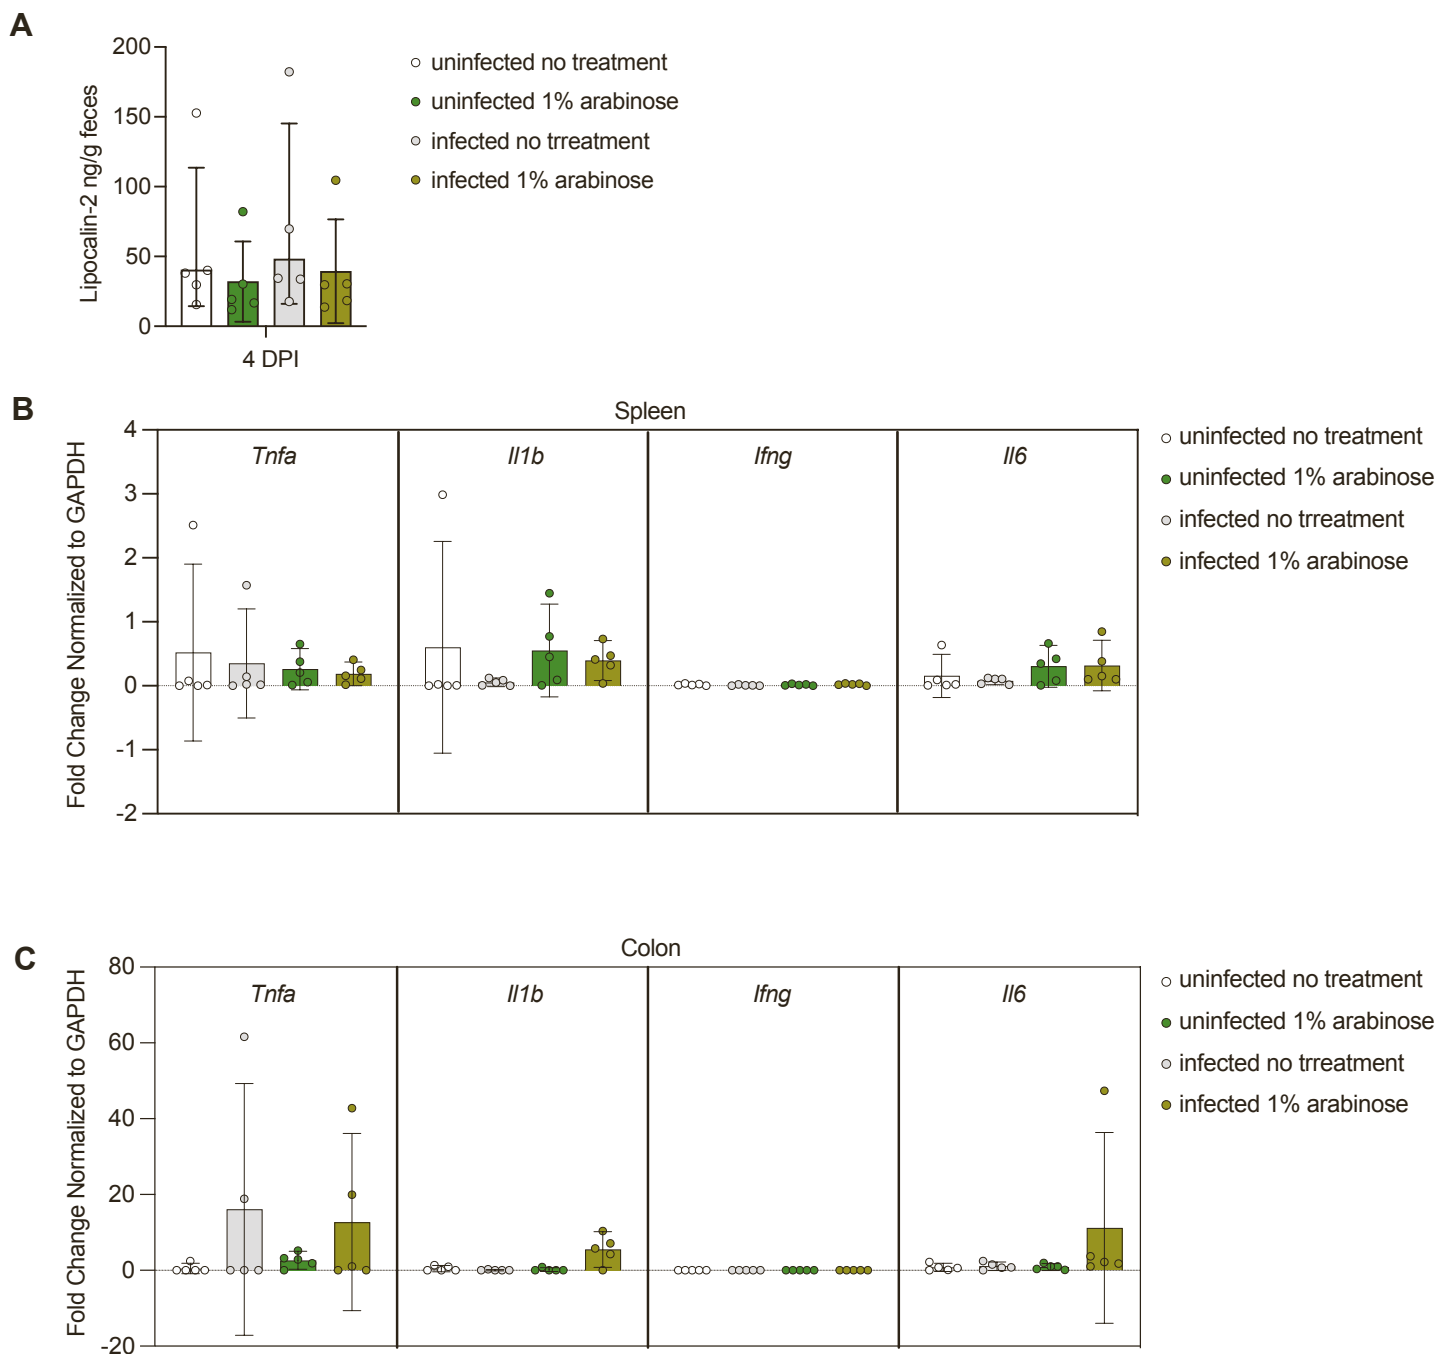

## Supplemental figure 4

**A**

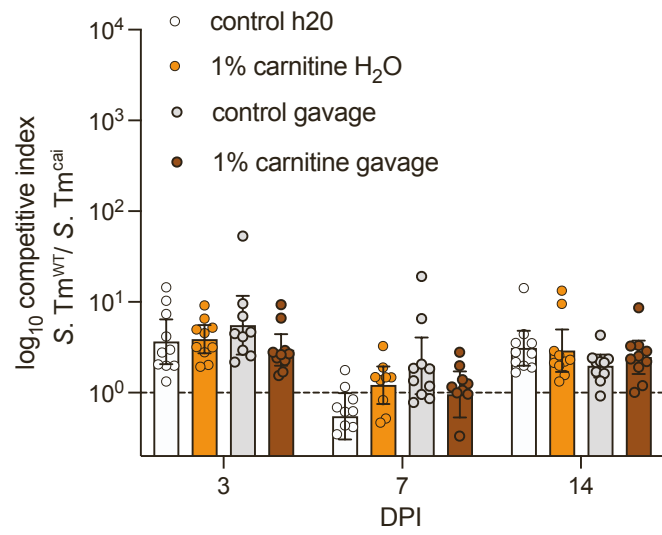

**B**

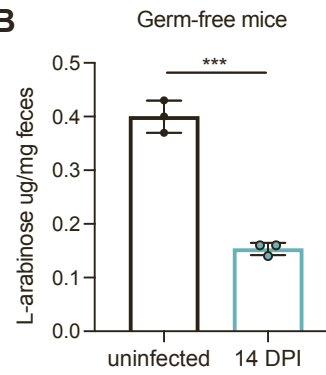

# Supplemental figure 5

**A**

| 1           | 11           | 21         | 31            | 41         | 50  |                |
|-------------|--------------|------------|---------------|------------|-----|----------------|
| MTTSLNSRRL  | WLHRLCALLL   | GTGSAL---- | -----VQAE     | NPIFTDVFTA | 40  | C. japonicus   |
| MRKKC-SVCL  | WILVLLSCL    | SGKSAYAATS | TTIAKHIGNS    | NPLIDHHLGA | 49  | B. subtilis    |
| M-RRL-TVRL  | FTAVLAALAL   | LTMGTPAHAT | APASPSVFTT    | NPLAEKR--A | 46  | S. avermitilis |
| M-----      | -----        | -----      | -----ANWP     | NPFIEQR--A | 13  | S. Typhimurium |
| DPAAALVH-KG | RVVLYAGRDE   | APDNT----- | ---TFFVMNEW   | LVYSSDDMAN | 82  | C. japonicus   |
| DPVALTY-NG  | RVYIYMSSDD   | YEYNSNGTIK | DNSFANLNRV    | FVISSADMVN | 98  | B. subtilis    |
| DPHIFKHTDG  | Y--YYFATVP   | -EYDRIVLRR | ATTLQGLA--    | ---TAPETTI | 89  | S. avermitilis |
| DPFILR--DG  | SDYFYIASVP   | -EYDRLEIRR | ANSLEGLR--    | ---AADPVVV | 55  | S. Typhimurium |
| WEAHPGLR--  | -AKDFTWAKG   | DA-----    | WA SQVI--ERNG | --KFYWYVTV | 120 | C. japonicus   |
| WTDHGAIPVA  | GANGANGGRG   | IAKWAGASWA | PSIAVKKING    | KDKFFLYFA- | 147 | B. subtilis    |
| WTKHASGVM-  | -----        | ---GAH--WA | PEIH--FIDG    | --KWYVYFAA | 120 | S. avermitilis |
| WRKPESGPM-  | -----        | ---SQL--WA | PEMH--RING    | --KWYVYFAA | 86  | S. Typhimurium |
| RHDD-----   | ---TKPGFAIG  | VAVGDSPIGP | FKDALGKALI    | TNDMTTDTPI | 162 | C. japonicus   |
| -----D      | ---NSGGGIG   | VLTADSPIGP | WTDPIGKPLV    | TPSTPGMSGV | 184 | B. subtilis    |
| GSTS-----   | D WFAIRMYVLE | SGAANPLTGS | W-----        | TEKGQIATPV | 156 | S. avermitilis |
| THTQALDKLG  | WQHRMFALE    | CADADPLTKG | W-----        | TEKGQIKTPF | 127 | S. Typhimurium |
| DWDDIDPSVF  | IDDDGQAYLF   | WGNTRP---- | -----         | ---RYAKL   | 193 | C. japonicus   |
| VW-LRDPAVF  | VDDDGTGYLY   | AGGGVPGVSN | PTQ---GQWA    | NPKTARVIKL | 230 | B. subtilis    |
| SSFSLDATTF  | VVN-GVRHLA   | WAQRNPAEDN | NTSLFIAKMA    | NPWT-----  | 199 | S. avermitilis |
| DTFALDATT   | YHQ-GKQWYL   | WAQKAPDIAG | NSNIYLAELE    | NPWT-----  | 170 | S. Typhimurium |
| KKNMVELDGP  | IRAIEGLPEF   | T-----     | EAIWVHKYQD    | NYLVS----- | 230 | C. japonicus   |
| GPDMTSVVG   | ASTIDA-PFM   | F-----     | EDSGLHKYNG    | TYYSY----- | 266 | B. subtilis    |
| -----ISGT   | PTEISQ-PTL   | SWETVGYKVN | EPPAVIQHGG    | KVFLTYSASA | 242 | S. avermitilis |
| -----IKGE   | PVRLSK-PEY   | DWECRGFVWN | EPPAVVVHGD    | KLFISYSASA | 213 | S. Typhimurium |

**B**

|                |             |            |            |           |             |             |             |             |            |         |           |           |           |      |      |     |
|----------------|-------------|------------|------------|-----------|-------------|-------------|-------------|-------------|------------|---------|-----------|-----------|-----------|------|------|-----|
| SL1344         | 1           | MANWPNPFI  | EQRADPFI   | LRDGSDDYF | IASVPEYDRLE | IRRAN       | SLEGLRAAD   | DPVVVWRKP   | PESGPM     | S       | 65        |           |           |      |      |     |
| S. Typhimurium | D23580      | 1          | MANWPNPFI  | EQRADPFI  | LRDGSDDYF   | IASVPEYDRLE | IRRAN       | SLEGLRAAD   | DPVVVWRKP  | PESGPM  | S         | 65        |           |      |      |     |
| S. Typhimurium | 4,[5],12:i- | 1          | MANWPNPFI  | EQRADPFI  | LRDGSDDYF   | IASVPEYDRLE | IRRAN       | SLEGLRAAD   | DPVVVWRKP  | PESGPM  | S         | 65        |           |      |      |     |
| S. Dublin      | ATCC 39184  | 1          | MANWPNPFI  | EQRADPFI  | LRDGSDDYF   | IASVPEYDRLE | IRRAD       | SLEGLRAAD   | DPVVVWRKP  | PESGPM  | S         | 65        |           |      |      |     |
| S. Paratyphi   | AATCC 9150  | 1          | MANWPNPFI  | EQRADPFI  | LRDGSDDYF   | IASVPEYDRLE | IRRAN       | SLEGLRAAD   | DPVVVWRKP  | KTGPM   | S         | 65        |           |      |      |     |
| S. Typhi       | Ty2         | 1          | MANWPNPFI  | EQRADPFI  | LRDGSDDYF   | IASVPEYDRLE | IRRAD       | SLEGLRAAD   | DPVVVWRKP  | PESGPM  | S         | 65        |           |      |      |     |
| SL1344         | 66          | QLIWAPEMHR | INGKWYI    | YFAATHQAL | DKLGMFQHRM  | FAL         | LECADADP    | LTGKWT      | EKGQ       | IKTPFDT | F         | 130       |           |      |      |     |
| S. Typhimurium | D23580      | 66         | QLIWAPEMHR | INGKWYI   | YFAATHQAL   | DKLGMFQHRM  | FAL         | LECADADP    | LTGKWT     | EKGQ    | IKTPFDT   | F         | 130       |      |      |     |
| S. Typhimurium | 4,[5],12:i- | 66         | QLIWAPEMHR | INGKWYI   | YFAATHQAL   | DKLGMFQHRM  | FAL         | LECADADP    | LTGKWT     | EKGQ    | IKTPFDT   | F         | 130       |      |      |     |
| S. Dublin      | ATCC 39184  | 66         | QLIWAPEMHR | INGKWYI   | YFAATHQAL   | DKLGMFQHRM  | FAL         | LECADADP    | LTGKWT     | EKGQ    | IKTPFDT   | F         | 130       |      |      |     |
| S. Paratyphi   | AATCC 9150  | 66         | QLIWAPEMHR | INGKWYI   | YFAATHQAL   | DKLGMFQHRM  | FAL         | LECADADP    | LTGKWT     | EKGQ    | IKTPFDT   | F         | 130       |      |      |     |
| S. Typhi       | Ty2         | 66         | QLIWAPEMHR | INGKWYI   | YFAATHQAL   | DKLGMFQHRM  | FAL         | LECADADP    | LTGKWT     | EKGQ    | IKTPFDT   | F         | 130       |      |      |     |
| SL1344         | 131         | ALDATT     | FYHQGKQY   | LWAQKAPD  | IAGNSNIYLA  | ELENPWT     | IKGEPVRLSKP | EYDWECR     | GFVW       | NEG     | 195       |           |           |      |      |     |
| S. Typhimurium | D23580      | 131        | ALDATT     | FYHQGKQY  | LWAQKAPD    | IAGNSNIYLA  | ELENPWT     | IKGEPVRLSKP | EYDWECR    | GFVW    | NEG       | 195       |           |      |      |     |
| S. Typhimurium | 4,[5],12:i- | 131        | ALDATT     | FYHQGKQY  | LWAQKAPD    | IAGNSNIYLA  | ELENPWT     | IKGEPVRLSKP | EYDWECR    | GFVW    | NEG       | 195       |           |      |      |     |
| S. Dublin      | ATCC 39184  | 131        | ALDATT     | FYHQGKQY  | LWAQKAPD    | IAGNSNIYLA  | ELENPWT     | IKGEPVRLSKP | EYDWECR    | GFVW    | NEG       | 195       |           |      |      |     |
| S. Paratyphi   | AATCC 9150  | 131        | ALDATT     | FYHQGKQY  | LWAQKAPD    | IAGNSNIYLA  | ELENPWT     | IKGEPVRLSKP | EYDWECR    | GFVW    | NEG       | 195       |           |      |      |     |
| S. Typhi       | Ty2         | 131        | SLDATT     | FYHQGKQY  | LWAQKAPD    | IAGNSNIYLA  | ELENPWT     | LK          | KGEPVRLSKP | EYDWECR | GFVW      | NEG       | 195       |      |      |     |
| SL1344         | 196         | PAVVVHGD   | KLFI       | SY SASATD | ENYCMGLLW   | INVNDP      | RDPA        | NWHK        | SPRPV      | F       | FTSYENRQY | GP        | GHNS      | 260  |      |     |
| S. Typhimurium | D23580      | 196        | PAVVVHGD   | KLFI      | SY SASATD   | ENYCMGLLW   | INVNDP      | RDPA        | NWHK       | SPRPV   | F         | FTSYENRQY | GP        | GHNS | 260  |     |
| S. Typhimurium | 4,[5],12:i- | 196        | PAVVVHGD   | KLFI      | SY SASATD   | ENYCMGLLW   | INVNDP      | RDPA        | NWHK       | SPRPV   | F         | FTSYENRQY | GP        | GHNS | 260  |     |
| S. Dublin      | ATCC 39184  | 196        | PAVVVHGD   | KLFI      | SY SASATD   | ENYCMGLLW   | INVNDP      | RDPA        | NWHK       | SPRPV   | F         | FTSYENRQY | GP        | GHNS | 260  |     |
| S. Paratyphi   | AATCC 9150  | 196        | PAVVVHGD   | KLFI      | SY SASATD   | ENYCMGLLW   | INVNDP      | LD          | PQ         | NWHK    | SPRPV     | F         | FTSYENRQY | GP   | GHNS | 260 |
| S. Typhi       | Ty2         | 196        | PAVVVHGD   | KLFI      | SY SASATD   | ENYCMGLLW   | INVNDP      | RDPA        | NWHK       | SPRPV   | F         | FTSYENRQY | GP        | GHNS | 260  |     |
| SL1344         | 261         | FTQT       | PEGENV     | LVIYHARNY | TE          | EGDPLYDP    | NRHTRLKRV   | RWD         | EN         | GMP     | DFGV      | P         | PADT      | I    | 316  |     |
| S. Typhimurium | D23580      | 261        | FTQT       | PEGENV    | LVIYHARNY   | TE          | EGDPLYDP    | NRHTRLKRV   | RWD        | EN      | GMP       | DFGV      | P         | PADT | I    | 316 |
| S. Typhimurium | 4,[5],12:i- | 261        | FTQT       | PEGENV    | LVIYHARNY   | TE          | EGDPLYDP    | NRHTRLKRV   | RWD        | EN      | GMP       | DFGV      | P         | PADT | I    | 316 |
| S. Dublin      | ATCC 39184  | 261        | FTQT       | PEGEDV    | LVIYHARNY   | TE          | EGDPLYDP    | NRHTRLKRV   | RWD        | EN      | GMP       | DFGV      | P         | PADT | I    | 316 |
| S. Paratyphi   | AATCC 9150  | 261        | FTQT       | PEGEDV    | LVIYHARNY   | TE          | EGDPLYDP    | NRHTRLKRV   | RWD        | EN      | GMP       | DFGV      | P         | PADT | I    | 316 |
| S. Typhi       | Ty2         | 261        | FTQT       | SEGEDV    | LVIYHARNY   | TE          | EGDPLYDP    | NRHTRLKRV   | RWD        | EN      | GMP       | DFGV      | P         | PADT | I    | 316 |

**Supplemental figure 1. *S. Tm* superspreaders and non-superspreaders have differentially enriched metabolic pathways at 7 and 14 DPI**

Corresponds with figure 1

- A) Differential pathway enrichment of non-superspreaders and superspreaders at 7 DPI with multiple hypothesis correction (Likelihood ratio with Benjamini & Hochberg correction).
- B) Differential pathway enrichment of non-superspreaders and superspreaders at 21 DPI with multiple hypothesis correction (Likelihood ratio with Benjamini & Hochberg correction).

**Supplemental figure 2. *S. Tm* genetic pathways enriched *in vivo* and *in vitro***

Corresponds with figure 2

- A) Log2 fold differences of differentially enriched genetic pathways (adjusted p-value < 0.05) *in vitro* (blue) and *in vivo* (red). Each data point represents single gene within each sub pathway (y-axis). Sub pathways are annotated with corresponding major pathways (brackets along y-axis)
- B) Principal component analysis of *in vivo* and *in vitro* transcriptomes. *In vivo* and *in vitro* transcriptomes separate along PC1.

**Supplemental figure 3: Exogenous dietary L-arabinose does not induce inflammation**

Corresponds with figure 4. The data in this figure are from a single mouse experiment.

- A) Lipocalin-2 levels detected in feces of the indicated groups 4-days post treatment (diet and/or infection) by Elisa. n=5 mice
- B) qRT-PCR of mRNA extracted from spleens from indicated groups 5 days post treatment. n=5 mice.
- C) qRT-PCR of mRNA extracted from colons from indicated groups 5 days post treatment. n=5 mice

**Supplemental figure 4: Carnitine supplementation does not confer a competitive advantage to WT *S. Tm* and L-arabinose concentrations decrease during infection in germ-free mice**

Corresponds with figure 4

- A) 129X1/SvJ mice were inoculated with an equal mixture of *S. Tm*<sup>WT</sup> and *S. Tm*<sup>cai</sup>. Each dot represents data from one animal (biological replicate). Bars represent +/- SEM. \*p < 0.05, \*\* p < 0.01. Kruskal-Wallis. No difference across groups. N=10 per group.
- B) L-Arabinose concentration in the germ-free mouse feces was quantified by liquid LC/MS. Students T test, \*\*\* p < 0.001

**Supplemental figure 5. *S. Tm* arabinofuranosidase has conserved functional residues with previously characterized arabinofuranosidases**

Corresponds with figure 5

- A) Amino acid sequence alignment of STM0148 (grey highlight) against three characterized arabinofuranosidase amino acid sequences. Red rectangles show conserved critical residues for enzyme function.
- B) Amino acid sequence alignment of STM0148 against five other *Salmonella* serovars'' arabinofuranosidase amino acid sequences. Red rectangles show conserved critical residues for enzyme function. Pink highlight indicates amino acid differences compared to SL1344 (first strand).

**Table S1: Related to Figure 5. SL1344 predicted glycoside hydrolases**

| <b>Gene ID</b>         | <b>Cazyme family</b> | <b>Reference accession</b> |
|------------------------|----------------------|----------------------------|
| SL1344_0018            | GH18                 | <a href="#">CBW16119.1</a> |
| SL1344_3087            | GH23                 | <a href="#">CBW19186.1</a> |
| SL1344_0016            | GH108                | <a href="#">CBW16117.1</a> |
| SL1344_0042            | GH31                 | <a href="#">CBW16143.1</a> |
| SL1344_0148            | GH43                 | <a href="#">CAB89837.1</a> |
| SL1344_0234            | GH19                 | <a href="#">CBW16336.1</a> |
| SL1344_0255 (MltD)     | GH23                 | <a href="#">CBW16357.1</a> |
| SL1344_0396            | GH13                 | <a href="#">CBW16496.1</a> |
| SL1344_0966 (NucD)     | GH24                 | <a href="#">CBW17063.1</a> |
| SL1344_1119 (FlgJ)     | GH73                 | <a href="#">CBW17215.1</a> |
| SL1344_1146 (NagZ)     | GH3                  | <a href="#">CBW17242.1</a> |
| SL1344_1188            | GH33                 | <a href="#">CBW17283.1</a> |
| SL1344_1251 (CelF)     | GH4                  | <a href="#">CBW17347.1</a> |
| SL1344_1488 (GlgX)     | GH13                 | <a href="#">CBW17583.1</a> |
| SL1344_1489            | GH13                 | <a href="#">CBW17584.1</a> |
| SL1344_1490            | GH13                 | <a href="#">CBW17585.1</a> |
| SL1344_1724 (TreA)     | GH37                 | <a href="#">CBW17819.1</a> |
| SL1344_1727 (MltE)     | GH23                 | <a href="#">CBW17822.1</a> |
| SL1344_1846            | GH105                | <a href="#">CBW17940.1</a> |
| SL1344_1892 (AmyA)     | GH13                 | <a href="#">CBW17987.1</a> |
| SL1344_1956            | GH19                 | <a href="#">CBW18053.1</a> |
| SL1344_2144 (BglX)     | GH3                  | <a href="#">CBW18240.1</a> |
| SL1344_2529 (YfhD)     | GH23                 | <a href="#">CBW18629.1</a> |
| SL1344_2576            | GH24                 | <a href="#">CBW18677.1</a> |
| SL1344_2686 (Nucd2)    | GH24                 | <a href="#">CBW18788.1</a> |
| SL1344_2811 (MltB)     | GH103                | <a href="#">CBW18909.1</a> |
| SL1344_2857 (IagB)     | GH23                 | <a href="#">CBW18955.1</a> |
| SL1344_2968 (MltA)     | GH102                | <a href="#">CBW19067.1</a> |
| SL1344_3027 (BglA)     | GH1                  | <a href="#">CBW19126.1</a> |
| SL1344_3480 (MalQ)     | GH77                 | <a href="#">CBW19575.1</a> |
| SL1344_3504 (GlgX)     | GH13                 | <a href="#">CBW19598.1</a> |
| SL1344_3505 (GlgB)     | GH13                 | <a href="#">CBW19599.1</a> |
| SL1344_3568 (TreF)     | GH37                 | <a href="#">CBW19662.1</a> |
| SL1344_3570 (fragment) | GH24                 | <a href="#">CBW19664.1</a> |
| SL1344_3582 (YhjM)     | GH8                  | <a href="#">CBW19676.1</a> |
| SL1344_3628 (BaX)      | GH73                 | <a href="#">CBW19721.1</a> |
| SL1344_3629 (MalS)     | GH13                 | <a href="#">CBW19722.1</a> |
| SL1344_3644            | GH127                | <a href="#">CBW19737.1</a> |
| SL1344_3715            | GH31                 | <a href="#">CBW19809.1</a> |
| SL1344_3740            | GH1                  | <a href="#">CBW19832.1</a> |



|                       |      |                            |
|-----------------------|------|----------------------------|
| SL1344_3767           | GHnc | <a href="#">CBW19857.1</a> |
| SL1344_3965           | GH31 | <a href="#">CBW20055.1</a> |
| SL1344_4153           | GH23 | <a href="#">CBW20241.1</a> |
| SL1344_4235           | GH4  | <a href="#">CBW20321.1</a> |
| SL1344_4358           | GH30 | <a href="#">CBW20445.1</a> |
| SL1344_4384 (TreC)    | GH13 | <a href="#">CBW20472.1</a> |
| SL1344_4509 (Sit)     | GH23 | <a href="#">CBW20598.1</a> |
| SL1344_P2_0087 (PilT) | GH23 | <a href="#">CCF76895.1</a> |

**Table S2: Related to STAR Methods. Oligonucleotides used in this study**

| <b>Primer name: description</b>                  | <b>Sequence 5'-3'</b>                                             | <b>Source</b> |
|--------------------------------------------------|-------------------------------------------------------------------|---------------|
| SR114: caiTABCD forward lambda                   | AAATCGGGAATTGAACCGAAGGTTTTTTTTCCGCC<br>ATTAAGTGTAGGCTGGAGCTGCTTC  | IDT           |
| SR115: caiTABCD reverse lambda                   | CGGATCGCGTTTTTCGGCAAATGCCTGCGGTCCTT<br>CGAGCCATATGAATATCCTCCTTAG  | IDT           |
| SR116: caiTABCD forward verification             | CTGGCTCAACAATATTGAACGC                                            | IDT           |
| SR117: caiTABCD reverse verification             | GCGAGTGGGCCAATATAAACAC                                            | IDT           |
| SR118: caiTABCD reverse/internal verification    | CGCGATGGTGTATACGCC                                                | IDT           |
| SR119: araBAD forward verification               | GACCAGGACGACAGAGCTTCC                                             | IDT           |
| SR120: araBAD reverse verification               | CAGATTCATCAACGCGCCC                                               | IDT           |
| SR121: araBAD reverse-internal verification      | GCGTCAGGGTATAGCTGCTTTCATACTC                                      | IDT           |
| SR148: 0148 lamda forward                        | AAACCCGTTTATTGAACAACGTGCCGATCCGTTTA<br>TTTTAGTGTAGGCTGGAGCTGCTTC  | IDT           |
| SR149: 0148 lamda reverse                        | TGGCGGCACGCCAAAATCAGGCATCCCGTTTTTCGT<br>CCCAGCATATGAATATCCTCCTTAG | IDT           |
| SR150: 0148 forward verification primer          | CGGCGTTGGCTATCTGATTA                                              | IDT           |
| SR151: 0148 reverse verification primer          | CAATATCAGGTGCTCACACGTCTG                                          | IDT           |
| SR150: 0148 reverse-internal verification primer | CTGGGAATGTTCCAGCATCG                                              | IDT           |
| Mouse IFN $\gamma$ qPCR forward                  | AGCGGCTGACTGAACTCAGATTGTAG                                        | IDT           |
| Mouse IFN $\gamma$ qPCR reverse                  | GTCACAGTTTTTCAGCTGTATAGGG                                         | IDT           |
| Mouse <i>GAPDH</i> qPCR F primer                 | ACAGTCCATGCCATCACTGCC                                             | IDT           |
| Mouse <i>GAPDH</i> qPCR R primer                 | GCCTGCTTCACCACCTTCTTG                                             | IDT           |
| Mouse TNF $\alpha$ qPCR F primer                 | GATCGGTCCCCAAAGGGATG                                              | IDT           |
| Mouse TNF $\alpha$ qPCR R primer                 | TGGTTTGTGAGTGTGAGGGTC                                             | IDT           |
| Mouse IL-6 qPCR F primer                         | TCCAGTTGCCTTCTTGGGAC                                              | IDT           |

|                                  |                                                 |     |
|----------------------------------|-------------------------------------------------|-----|
| Mouse IL-6 qPCR R primer         | AGTCTCCTCTCCGGACTTGT                            | IDT |
| Mouse IL-1 $\beta$ qPCR F primer | AGCTTCCTTGTGCAAGTGTCT                           | IDT |
| Mouse IL-1 $\beta$ qPCR R primer | GACAGCCCAGGTCAAAGGTT                            | IDT |
| Pfog forward                     | CGATTCTGAATTCTATCGATAAGCTTGATATCGCGA<br>CAAG    | IDT |
| Pfog reverse                     | CGATTCGGATCCCGCTCTAGAACTAGTGGATCGGA<br>TAAATC   | IDT |
| 0148_up_forward                  | CGACAAGTGAATCCAATAT                             | IDT |
| 0148_up_reverse                  | CTTTTGGATCGTTAGTGATCACGCCCTGGCATTAT<br>CGTCTGTC | IDT |
| 0148_insert_forward              | CGTGATCACTAACGATCCAAAAG                         | IDT |
| 0148_insert_reverse              | CAGTTTGCGGGAAGACTTTCAC                          | IDT |
